# Supplementary figures and images for: Akt-mediated phosphorylation of CDK2 regulates its dual role in cell cycle progression and apoptosis
Source: Oxford University Press journal article supplement (doi:10.1242/jcs.009530), 2008-03-19

**A**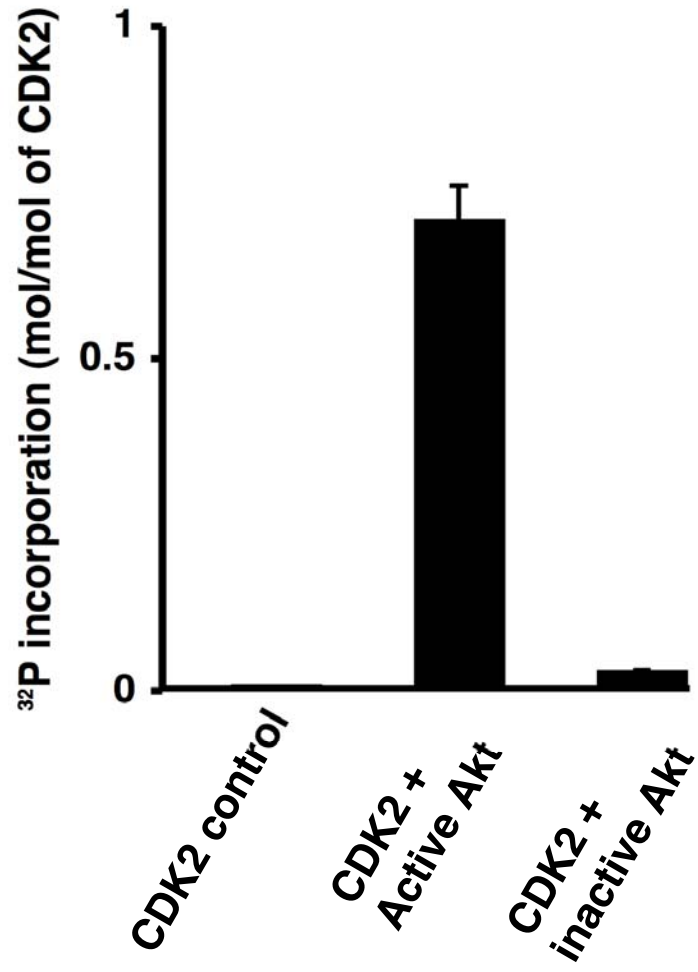**B**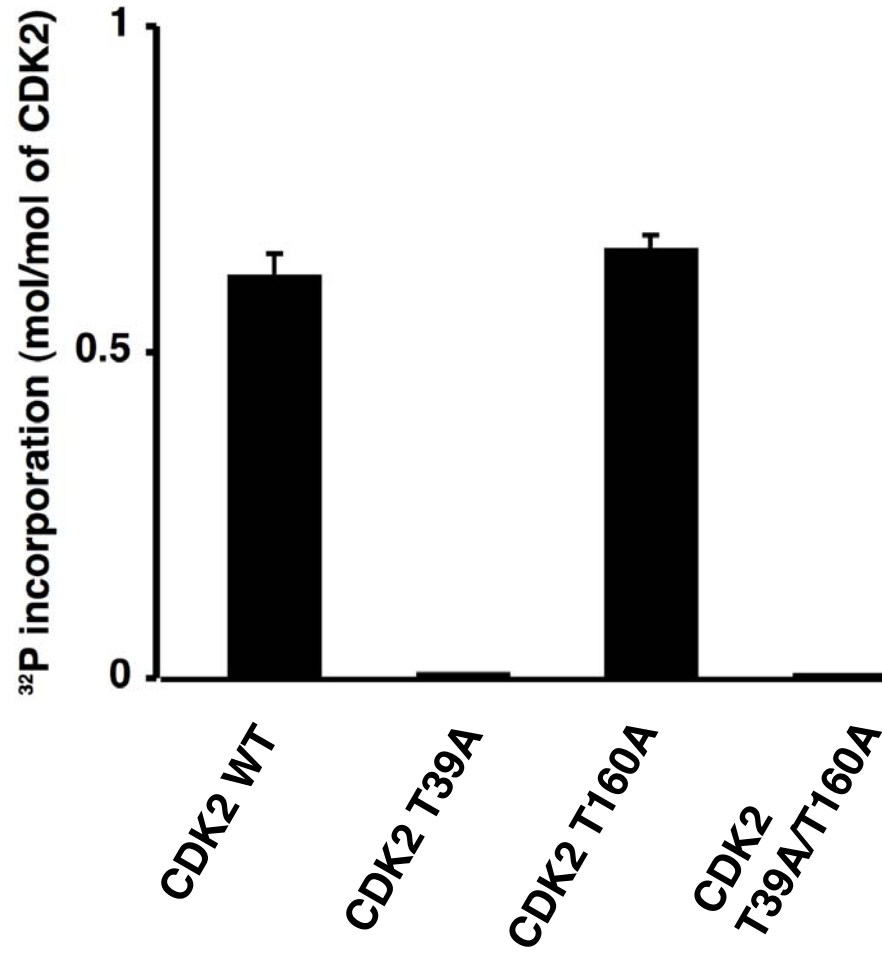

Supplement: jcs009530-figs1.pdf [file jcs009530-figs1.pdf]

**DAPI**

**HA-CDK2-  
T39A-Cy3**

**G0 phase**

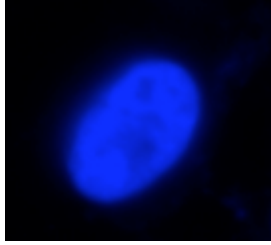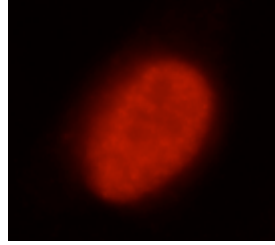

**G1 phase**

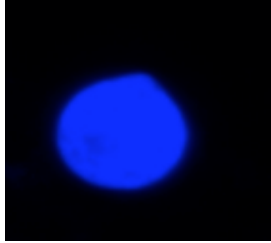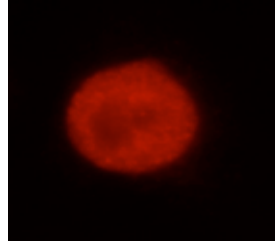

**S Phase**

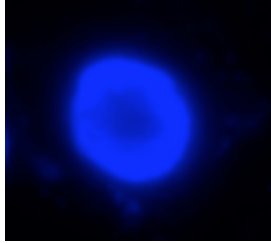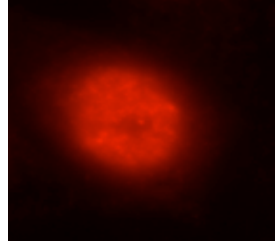

**G2 Phase**

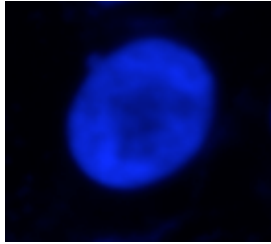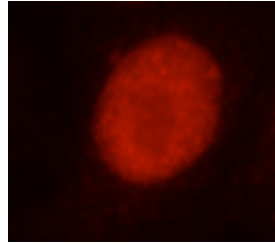

Supplement: jcs009530-figs2.pdf [file jcs009530-figs2.pdf]
